# Supplementary material for: Long-term activity drives dendritic branch elaboration of a C. elegans sensory neuron
Source: PubMed Central journal article supplement (PMC7170766; doi:10.1016/j.ydbio.2020.01.005), 2020-05-01

*egl-19(gf);gcy-35* day 4 adults - Simple

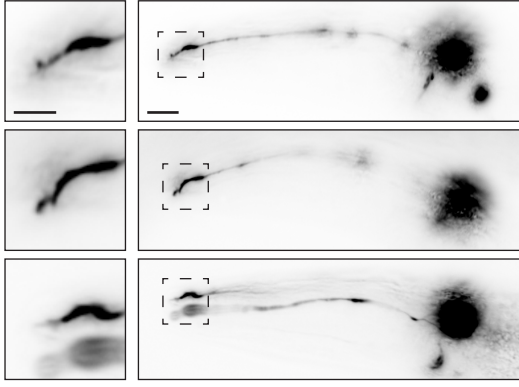

*egl-19(gf);cng-1* day 4 adults - Simple

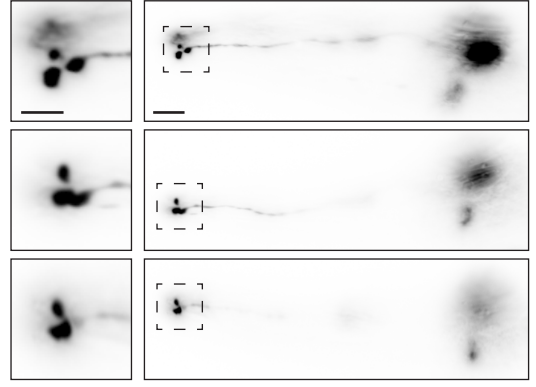

**A**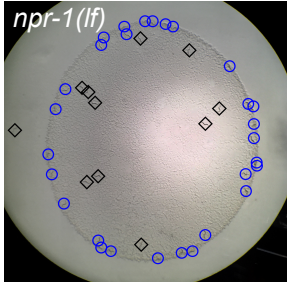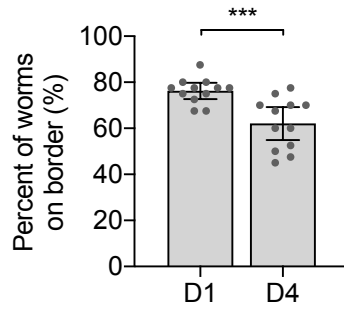**B**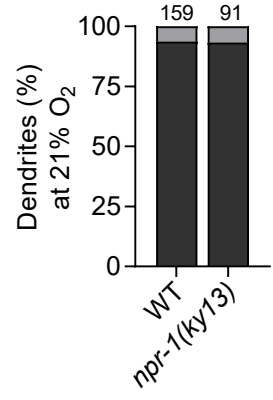

Supplement: NIHMS1551529-supplement-1.pdf [file NIHMS1551529-supplement-1.pdf]
